# Supplementary material
Source: Research Square preprint supplement (doi:10.21203/rs.3.rs-9716594/v1)

**Appendix Table 1: Program output of the estimation propensity score for matching**


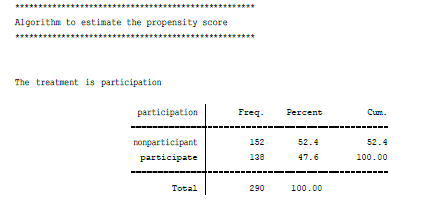


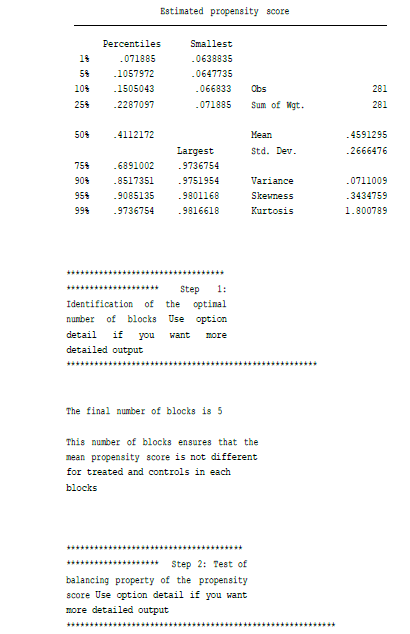


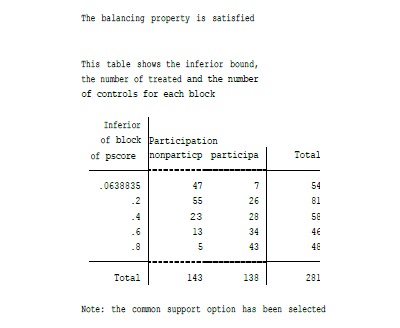


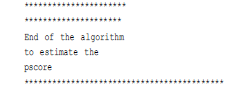


**Appendix: Table 2: Testing the balance of covariates after matching**


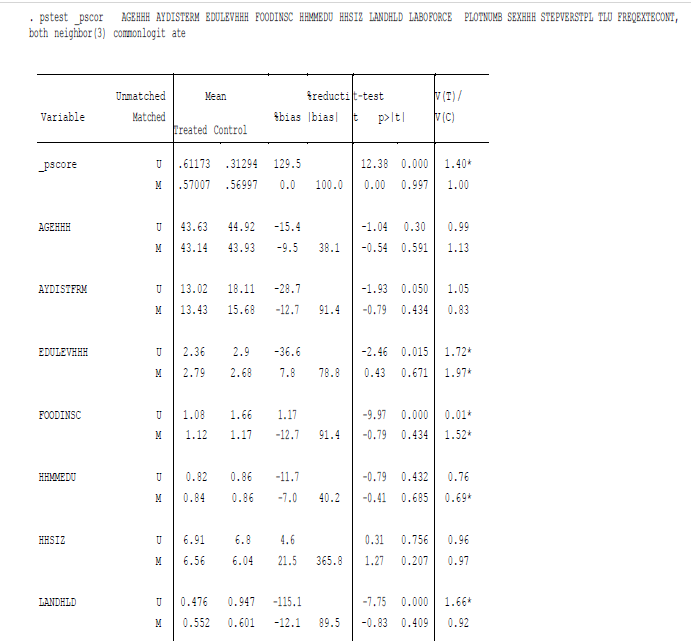


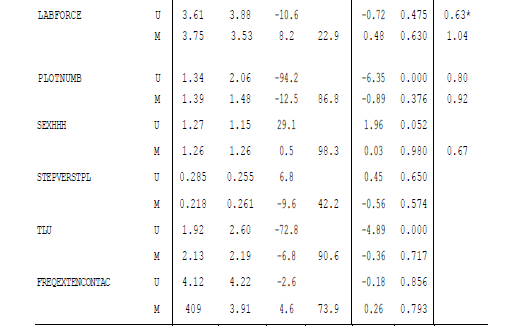


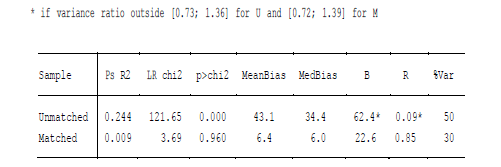


**Appendix: Table 3: Bootstrapping**


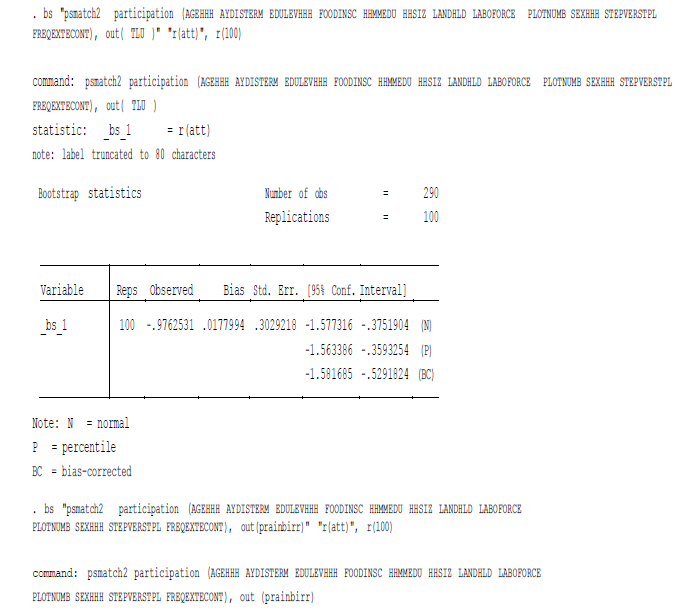


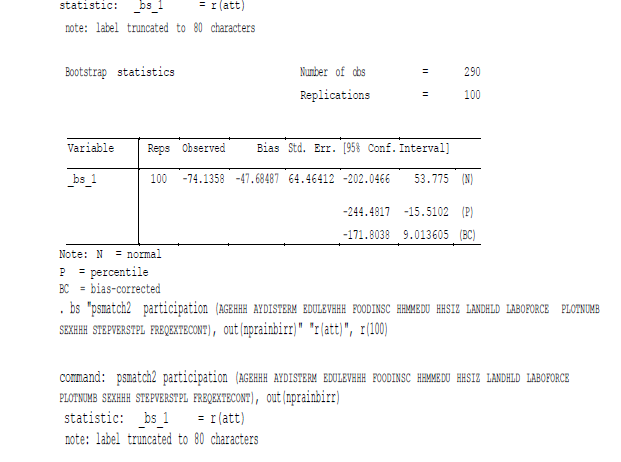


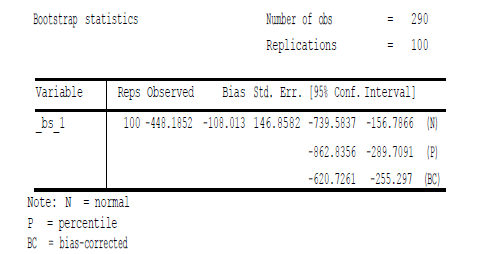


**Appendix: Table 4: Sensitivity analysis for estimated ATT of households TLU**


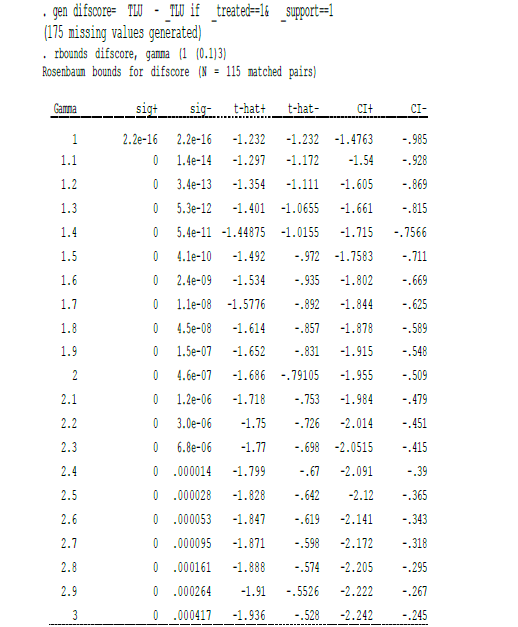


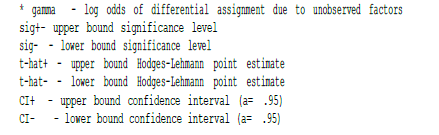


**Appendix: Table 5: Sensitivity analysis for estimated ATT of households’ productive asset**


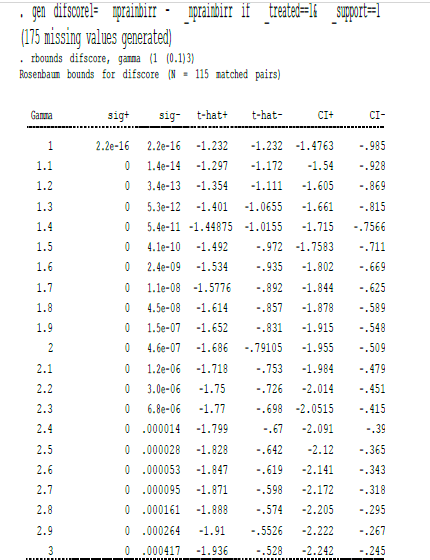


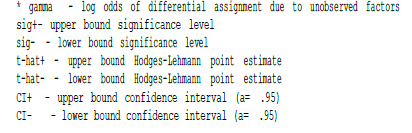


**Appendix: Table 6: Sensitivity analysis for estimated ATT of household non-productive asset**


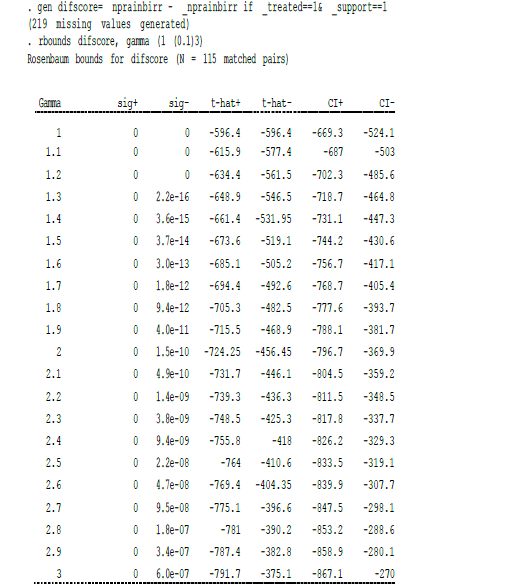


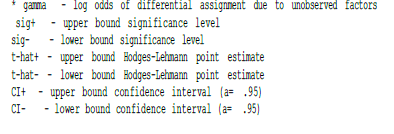

Supplement: Supplementary file 1 [file 3f2366b94df9eb644885599a.docx]
